# Supplementary material for: Effect of Abiotic Treatments on Agricultural Plastic Waste: Efficiency of the Degradation Processes
Source: MDPI journal article supplement (doi:10.3390/polym16030359), 2024-01-29
Supplement: s1 [file s1]

### Supplementary Material

**Table S1.** Temperature of degradation and weight losses obtained with TGA analysis of the PS sample after photo-oxidation pre-treatments.

| Sample name   | PT <sup>1</sup> | Conditions  | T at 98%<br>wt (°C) | T at 95%<br>wt (°C) | T at 50%<br>wt (°C) | T <sub>max</sub><br>(°C) | Residue<br>(wt %) |
|---------------|-----------------|-------------|---------------------|---------------------|---------------------|--------------------------|-------------------|
| PS_virgin     | none            | Non-treated | 323.2               | 393.8               | 434.8               | 435.7                    | 0.67              |
| PS_UVB_60h    | UV              | UVB 60h     | 257.5               | 346.8               | 434.3               | 435.9                    | 2.92              |
| PS_UVB_90h    | UV              | UVB 90h     | 257.8               | 349.3               | 433.2               | 434.8                    | 2.80              |
| PS_UVB_120h   | UV              | UVB 120h    | 237.6               | 323.0               | 432.4               | 433.9                    | 3.20              |
| PS_UVC_30h    | UV              | UVC 30h     | 296.9               | 379.4               | 436.0               | 437.0                    | 1.59              |
| PS_UVC_45h    | UV              | UVC 60h     | 320.0               | 383.4               | 435.3               | 436.3                    | 1.41              |
| PS_UVC_60h    | UV              | UV C90h     | 307.0               | 379.8               | 435.4               | 437.1                    | 1.43              |
| PS_e-beam_600 | e-beam          | 600 Gky     | 303.4               | 384.5               | 430.6               | 431.3                    | 2.17              |

<sup>1</sup> type of pre-treatment.

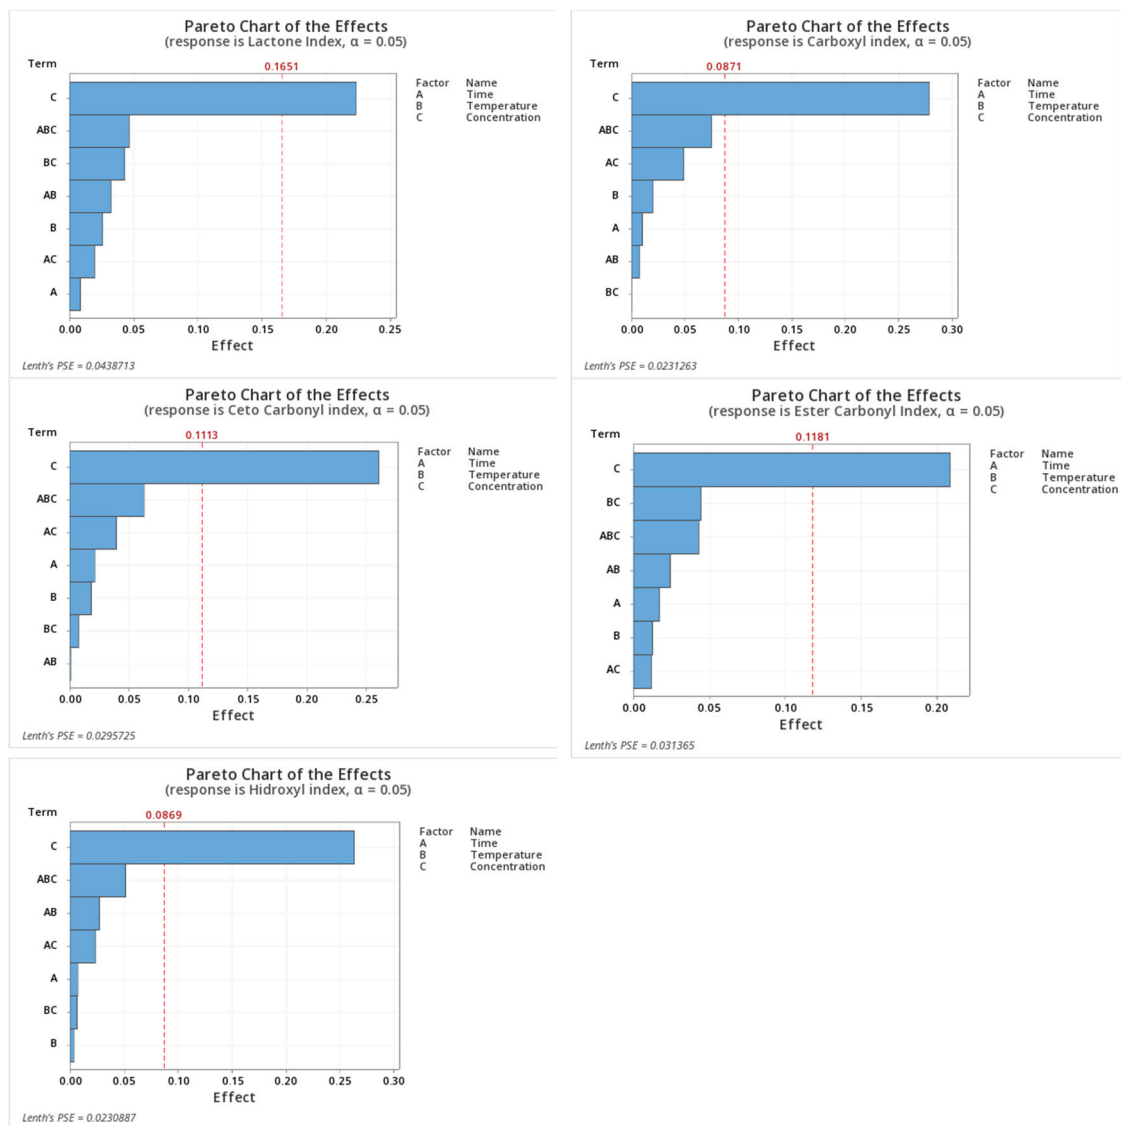

**Figure S1.** Pareto charts for different FTIR indexes in the pre-treatment of PS with aqua regia.

**Table S2.** Temperature of degradation and weight losses obtained with TGA analysis of the LDPE sample after photo-oxidation pre-treatments.

| <b>Sample name</b> | <b>PT<sup>1</sup></b> | <b>Condition<br/>s</b> | <b>T at 98%<br/>wt (°C)</b> | <b>T at 95%<br/>wt (°C)</b> | <b>T at 50%<br/>wt (°C)</b> | <b>T<sub>max</sub><br/>(°C)</b> | <b>Residue<br/>(wt %)</b> |
|--------------------|-----------------------|------------------------|-----------------------------|-----------------------------|-----------------------------|---------------------------------|---------------------------|
| LDPE_virgin        | none                  |                        | 412.7                       | 427.7                       | 466.0                       | 470.2                           | 4.94                      |
| LDPE_UVB_250h      | UV                    | UVB 250h               | 417.0                       | 428.2                       | 465.4                       | 470.3                           | 5.17                      |
| LDPE_UVB_500h      | UV                    | UVB 500h               | 406.7                       | 422.6                       | 462.6                       | 467.5                           | 2.79                      |
| LDPE_UVC_250h      | UV                    | UVB 250h               | 402.8                       | 422.2                       | 466.6                       | 472.1                           | 3.63                      |
| LDPE_UVC_500h      | UV                    | UVC500h                | 378.5                       | 416.1                       | 464.2                       | 469.1                           | 3.90                      |
| LDPE_e-beam_300(1) | e-beam                | 300(1)                 | 393.7                       | 414.3                       | 462.5                       | 468.8                           | 1.75                      |
| LDPE_e-beam_400(1) | e-beam                | 400(1)                 | 394.9                       | 414.1                       | 462.9                       | 469.4                           | 1.97                      |
| LDPE_e-beam_400(2) | e-beam                | 400(2)                 | 392.6                       | 415.1                       | 465.1                       | 472.0                           | 1.03                      |
| LDPE_e-beam_450(2) | e-beam                | 450(2)                 | 391.2                       | 414.6                       | 465.3                       | 471.8                           | 1.02                      |

<sup>1</sup> type of pre-treatment.

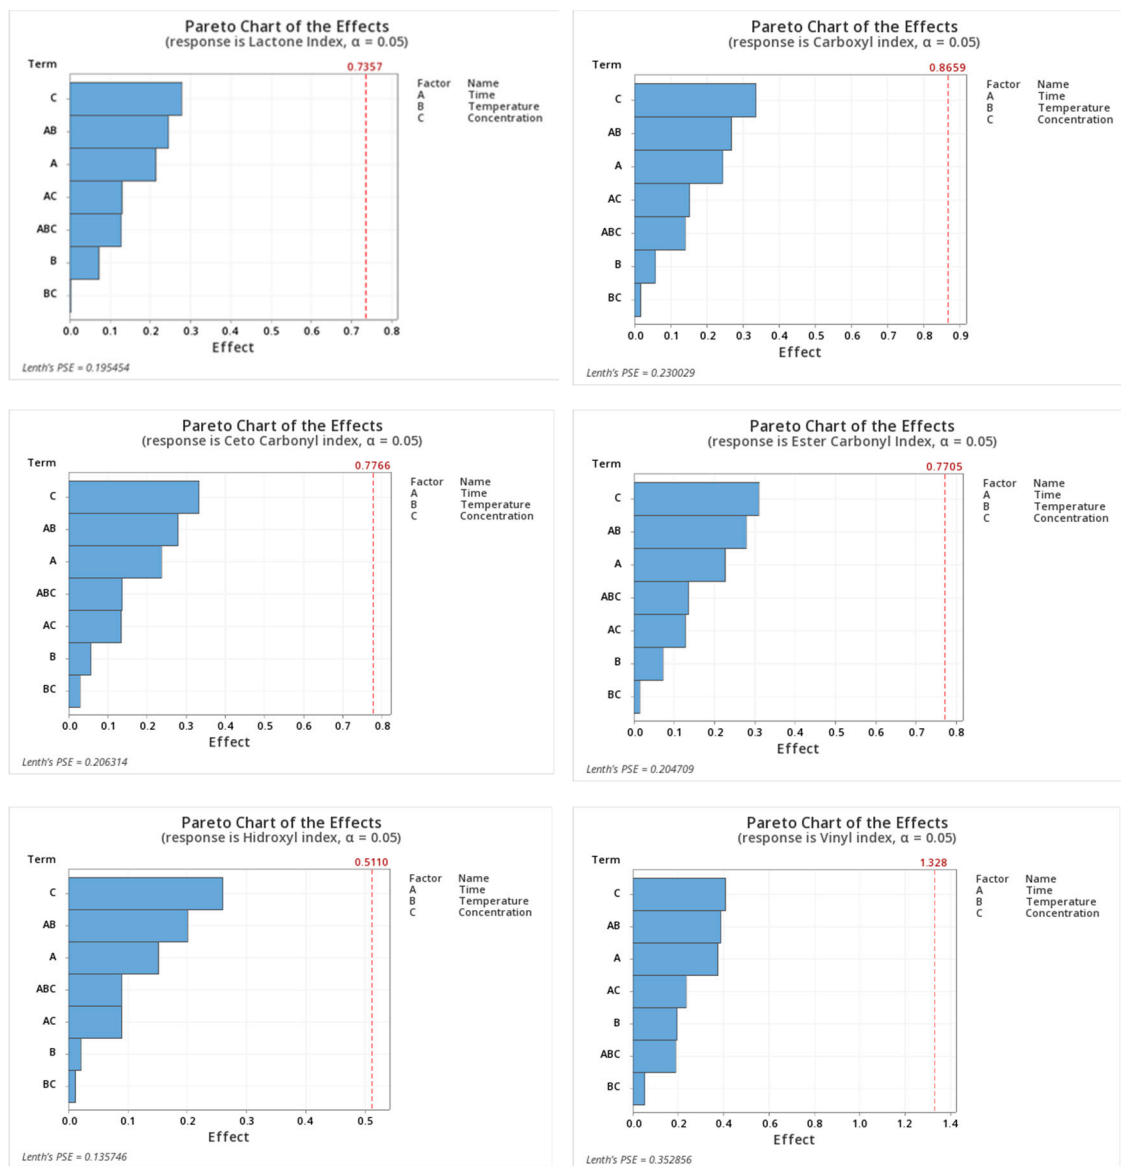

**Figure S21.** Pareto charts for the different FTIR indexes in the pre-treatment of LDPE with ammonium persulfate.



**Figure S3.** Pareto charts for other different FTIR indexes in the pre-treatment of LDPE with aqua regia.

**Table S3.** Temperature of degradation and weight losses obtained with TGA analysis of the LLDPE sample after photo-oxidation pre-treatments.

| Sample name         | PT <sup>1</sup> | Conditions | T at 98% wt (°C) | T at 95% wt (°C) | T at 50% wt (°C) | T <sub>max</sub> (°C) | Residue (wt %) |
|---------------------|-----------------|------------|------------------|------------------|------------------|-----------------------|----------------|
| LLDPE_virgin        | none            |            | 417.4            | 431.7            | 469.9            | 474.2                 | 3.10           |
| LLDPE_UVB_250h      | UV              | UVB 250h   | 417.3            | 433.3            | 469.7            | 473.9                 | 2.75           |
| LLDPE_UVB_500h      | UV              | UVB 500h   | 412.8            | 428.3            | 467.1            | 471.2                 | 4.19           |
| LLDPE_UVC_250h      | UV              | UVB 250h   | 413.5            | 427.7            | 467.9            | 472.6                 | 3.77           |
| LLDPE_UVC_500h      | UV              | UVC500h    | 365.7            | 412.2            | 464.9            | 470.7                 | 2.81           |
| LLDPE_e-beam_300(1) | e-beam          | 300(1)     | 406.9            | 425.1            | 468.0            | 473.9                 | 1.17           |
| LLDPE_e-beam_400(1) | e-beam          | 400(1)     | 407.1            | 424.7            | 467.1            | 473.0                 | 1.21           |
| LLDPE_e-beam_250(2) | e-beam          | 250(2)     | 405.8            | 423.9            | 467.3            | 473.1                 | 1.35           |
| LLDPE_e-beam_250(2) | e-beam          | 250(2)     | 407.8            | 424.8            | 467.2            | 473.1                 | 1.40           |
| LLDPE_e-beam_300(2) | e-beam          | 300(2)     | 403.5            | 419.7            | 464.9            | 471.0                 | 2.88           |
| LLDPE_e-beam_350(2) | e-beam          | 350(2)     | 405.3            | 423.3            | 466.5            | 472.3                 | 1.20           |
| LLDPE_e-beam_400(2) | e-beam          | 400(2)     | 407.4            | 424.1            | 465.5            | 470.7                 | 1.31           |
| LLDPE_e-beam_450(2) | e-beam          | 450(2)     | 402.6            | 421.2            | 464.0            | 469.5                 | 1.52           |
| LLDPE_e-beam_333(3) | e-beam          | 300(2)     | 417.4            | 431.7            | 469.9            | 474.2                 | 3.10           |

<sup>1</sup> type of pre-treatment.

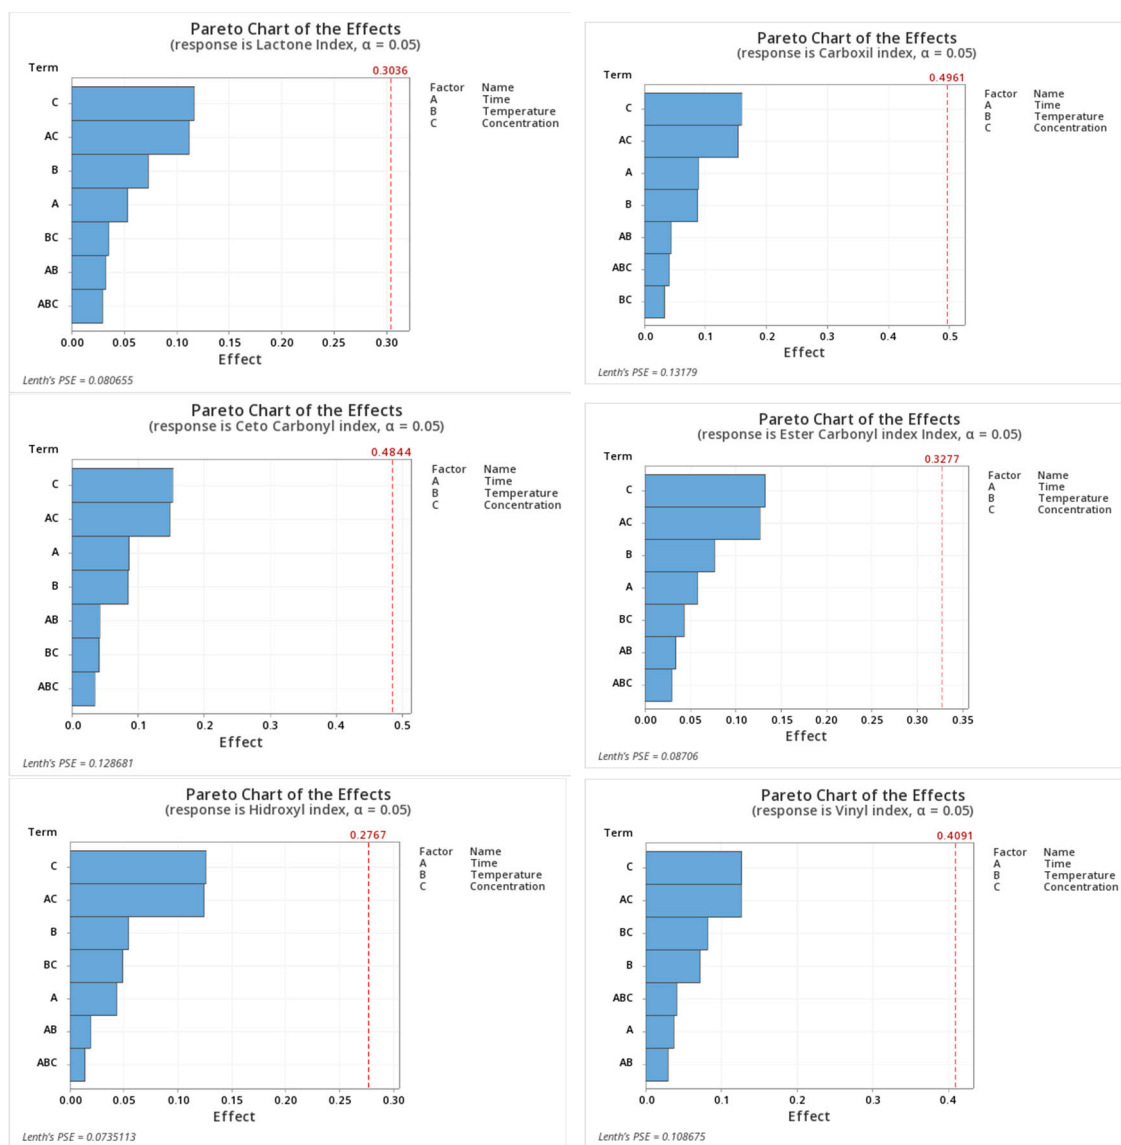

**Figure 2S4.** Pareto charts for other different FTIR indexes in the pre-treatment of LLDPE with ammonium persulfate.

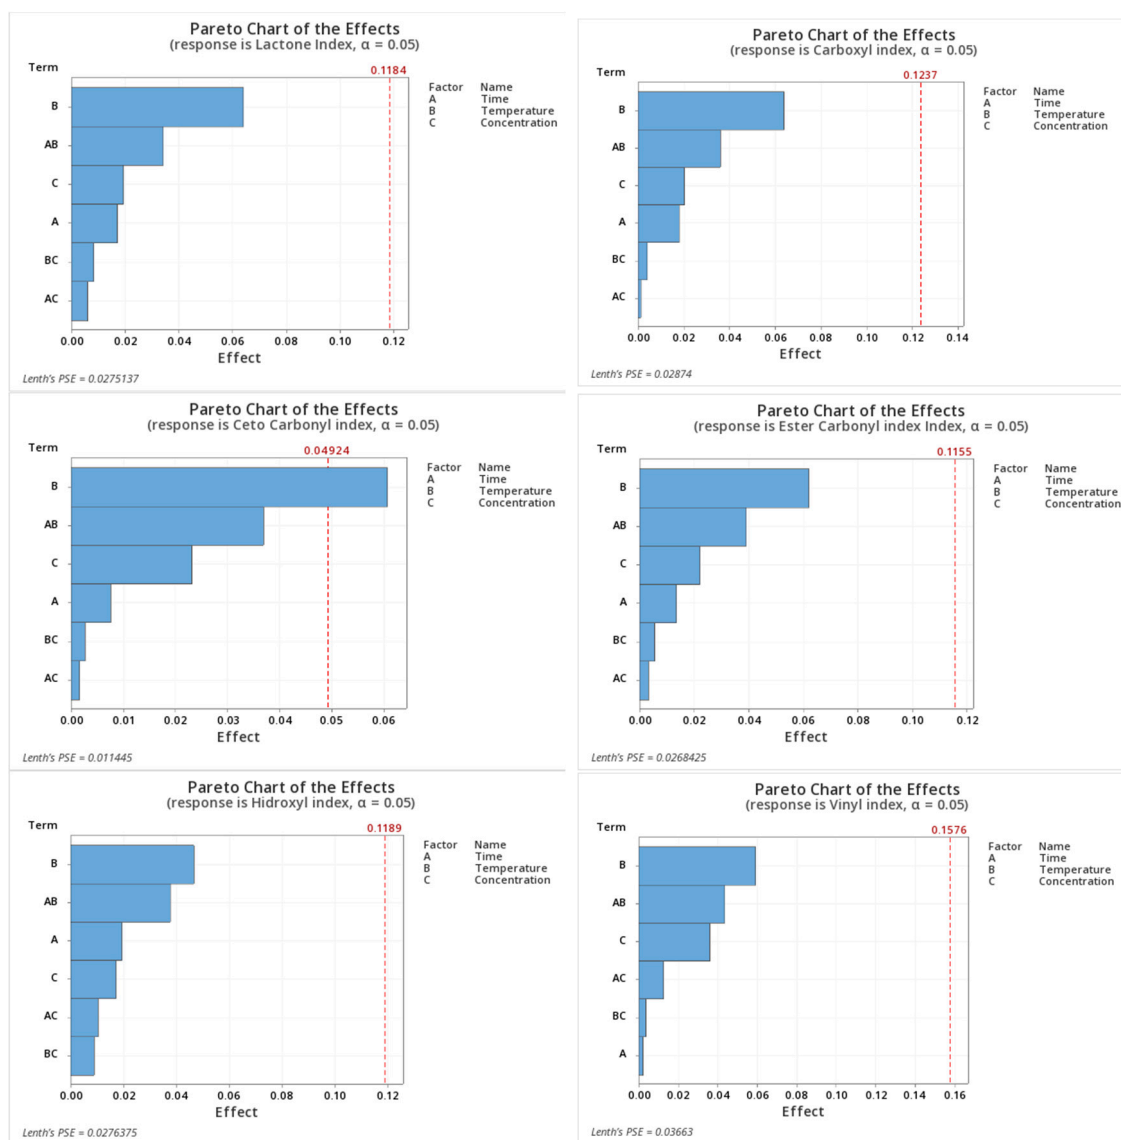

**Figure 3S5.** Pareto charts for the different FTIR indexes in the pre-treatment of LLDPE with aqua regia.



**Table S4.** Temperature of degradation and weight losses obtained with TGA analysis of the PET sample after photo-oxidation pre-treatments.

| <b>Sample name</b> | <b>PT<sup>1</sup></b> | <b>Conditions</b> | <b>T at 98%<br/>wt (°C)</b> | <b>T at 95%<br/>wt (°C)</b> | <b>T at 50%<br/>wt (°C)</b> | <b>T<sub>max</sub><br/>(°C)</b> | <b>Residue<br/>(wt %)</b> |
|--------------------|-----------------------|-------------------|-----------------------------|-----------------------------|-----------------------------|---------------------------------|---------------------------|
| PET not treated    | none                  | Non-treated       | 381.7                       | 394.3                       | 432.2                       | 432.5                           | 11.66                     |
| PET_UVB 60h        | UV                    | UVB 60h           | 380.0                       | 394.2                       | 432.9                       | 433.4                           | 11.73                     |
| PET_UVB 90h        | UV                    | UVB 90h           | 376.4                       | 392.9                       | 431.6                       | 432.0                           | 11.85                     |
| PET_UVB 120h       | UV                    | UVB 120h          | 377.6                       | 393.2                       | 431.5                       | 432.0                           | 12.06                     |
| PET_UVC 30h        | UV                    | UVC30h            | 382.3                       | 394.6                       | 432.2                       | 432.6                           | 11.71                     |
| PET_UVC 45h        | UV                    | UVC60h            | 383.3                       | 394.7                       | 431.9                       | 432.5                           | 11.71                     |
| PET_UVC 60h        | UV                    | UVC90h            | 383.6                       | 395.7                       | 432.0                       | 431.9                           | 11.82                     |
| PET_e-beam_300(2)  | e-beam                | 300(2)            | 377.2                       | 394.2                       | 434.6                       | 435.5                           | 12.47                     |

<sup>1</sup> type of pre-treatment.
